# Supplementary material for: PfApiAT2 is a proline transporter essential for the transmission of Plasmodium falciparum by the mosquito vector.
Source: Research Square preprint supplement (doi:10.21203/rs.3.rs-8655193/v1), 2026-02-04
Supplement: Supplementary file 3 [file fd87e19b34b92067b4f844e3.xlsx]

## Sheet: Sheet1
Supplementary Table 1
Sequence name	Sequence (5' --> 3')	Description
P1	AAGGAACATATAGGATACCCAAC	PCR for PfApiAT2-KO insertion and sequencing HFG-R parasites
P2	GAGGTTTAGATAATGAATTTCTGTCTG	PCR for PfApiAT2-KO insertion
P3	GGTGTTCTCTCTGATGTCC	PCR for PfApiAT2-KO insertion
P4	CTTTTATCATGCACATTGGAATAATAC	PCR for PfApiAT2-KO insertion
P5	CAAATTAATAGTGAACGTGCTACC	PCR for PfApiAT2-smHA insertion
P6	CCTTCCATATTAGGAACATTTATCATAAG	PCR for PfApiAT2-smHA insertion
P7	CATCATAAGGGTAGCCAGCATAATC	PCR for PfApiAT2-smHA insertion
P8	CAGGAAACAGCTATGACCATG	PCR for PfApiAT2-smHA insertion
P9	GTTTGTATATATATGTGTGGGGGG	Sequencing HFG-R parassites
P10	AGATCTCAATTGCCATGGGATCTTTCTTTATGACCAATGCATATG	Cloning 5'HR of PfApiAT2-smHA donor plasmid
P11	GGATGTATATATTTGAAaGTTACAGAAAAGAAGAAAAACAAAAACCTCGAGATGTACCC	Cloning 5'HR of PfApiAT2-smHA donor plasmid
P12	CGTCAGGATCATCGCGGCCGCGAAGCAAATGGTAAAACAATGCAG	Cloning 3'HR of PfApiAT2-smHA donor plasmid
P13	CAGATGAATTTACTTCATTTTTCAAATATATAATGTGAGATCTCAATTGCCATGG	Cloning 3'HR of PfApiAT2-smHA donor plasmid
PfApiAT2_Xl	ATGGCGAGCGATGTTAGCAAGGAAAATATTAGCCAGCTAAAGTATGAAGGTCAGGCGCCGAACGACCTAAAAATTAACAAATGGATTGCGCTAGTTCTGTATGCGATTGTAGCGAGTGTTGCGACCTTTGTTCATGGTGGTTTTTCTGGTTGGCAGCCGATTATTTATAAAACAGGTGCGTTTAGCGAACTGTGTAAAGAAGGTGATGAAGTTCAAATTTTTAAAGTTGACGAGAATATTAGCTATAATAGTTGTGGTAATAGAGATGCGGCGATTAATAATCTGTTTACACTGTCGTTCTTTCTGCATTTTTTCCTGAGCAGCATGTCTGGTTTTATTCTGGATACGTTTGGTGAAAAAGTTTGTTTCCTGTGTGGTCAGATTATTCTGGCGCTGGCG…	Codon-harmonized sequence of PfApiAT2 (PF3D7_0914700), for heterologous expression in Xenopus laevis oocytes
PfApiAT2-mNG_Xl	ATGGCGAGCGATGTTAGCAAGGAAAATATTAGCCAGCTAAAGTATGAAGGTCAGGCGCCGAACGACCTAAAAATTAACAAATGGATTGCGCTAGTTCTGTATGCGATTGTAGCGAGTGTTGCGACCTTTGTTCATGGTGGTTTTTCTGGTTGGCAGCCGATTATTTATAAAACAGGTGCGTTTAGCGAACTGTGTAAAGAAGGTGATGAAGTTCAAATTTTTAAAGTTGACGAGAATATTAGCTATAATAGTTGTGGTAATAGAGATGCGGCGATTAATAATCTGTTTACACTGTCGTTCTTTCTGCATTTTTTCCTGAGCAGCATGTCTGGTTTTATTCTGGATACGTTTGGTGAAAAAGTTTGTTTCCTGTGTGGTCAGATTATTCTGGCGCTGGCG…	Codon-harmonized sequence of fusion protein PfApiAT2-mNeonGreen (PF3D7_0914700), for heterologous expression in Xenopus laevis oocytes
